# Supplementary material for: Facile preparation of transition metal oxide–metal composites with unique nanostructures and their electrochemical performance as energy storage material
Source: Royal Society of Chemistry journal article supplement (doi:10.1039/c3ta13260a), 2013-01-01
Supplement: c3ta13260a.pdf [file c3ta13260a.pdf]

## Electronic Supplementary Information (ESI)

### Facile preparation of transition metal oxide-metal composites with unique nanostructures and their electrochemical performance as energy storage material

Kui Cheng, Fan Yang, Ke Ye, Yiju Li, Sainan, Yang, Jinling Yin, Guiling Wang,

Dianxue Cao\*

*Key Laboratory of Superlight Material and Surface Technology of Ministry of*

*Education, College of Material Science and Chemical Engineering, Harbin*

*Engineering University, Harbin, 150001, P.R.China*

*E-mail: [caodianxue@hrbeu.edu.cn](mailto:caodianxue@hrbeu.edu.cn)*

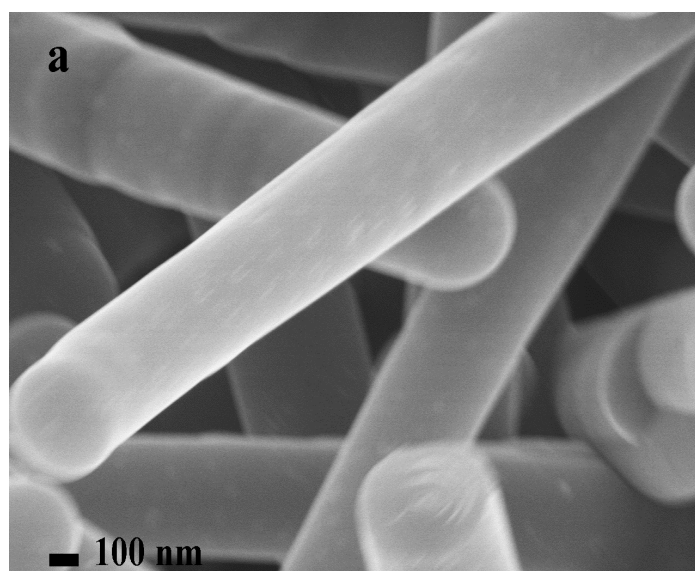

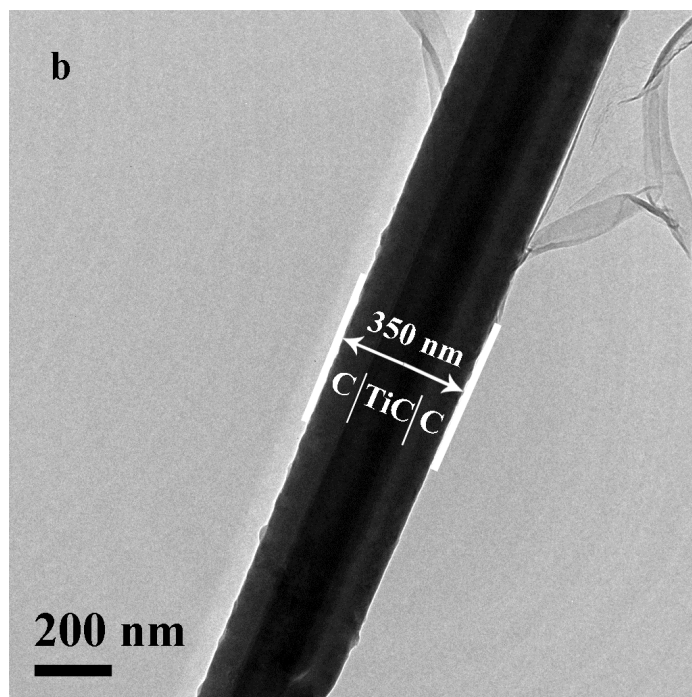

Figure S1 SEM (a) and TEM (b) images of a single C@TiC nanowire.

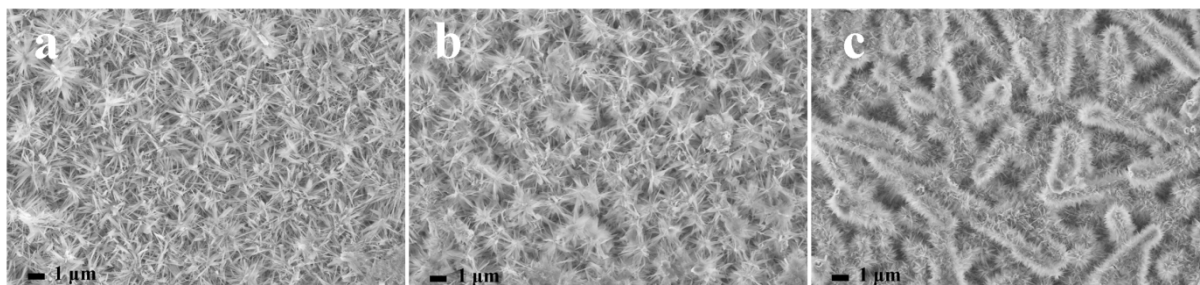

Figure S2. SEM images of the NiO-Ni@C@TiC nanoarray electrodes prepared with different electrodeposition time, (a) 10 min, (b) 15 min and (c) 20 min.

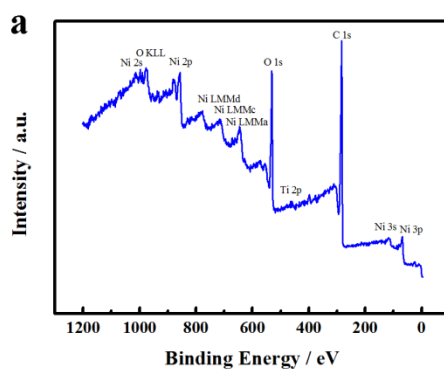

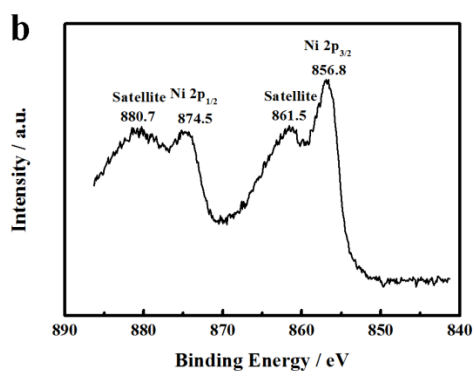

Figure S3 XPS survey spectra of NiO-Ni@C@TiC nanoarray (a); Ni 2p XPS spectra of NiO-Ni@C@TiC nanoarray (b).

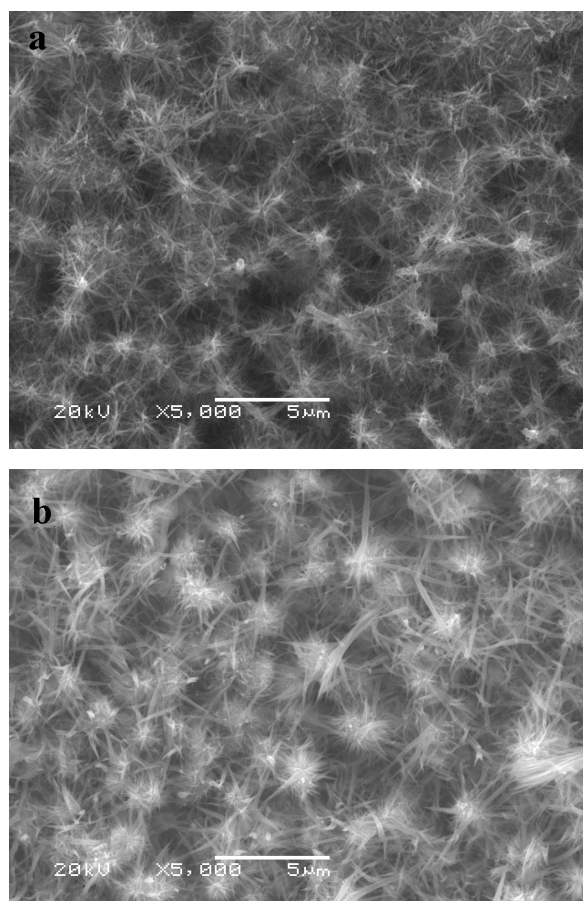

Figure S4. SEM images of Co<sub>3</sub>O<sub>4</sub>-Co@C@TiC (a) and MnO<sub>2</sub>-Mn@C@TiC (b) nanoarray electrodes.

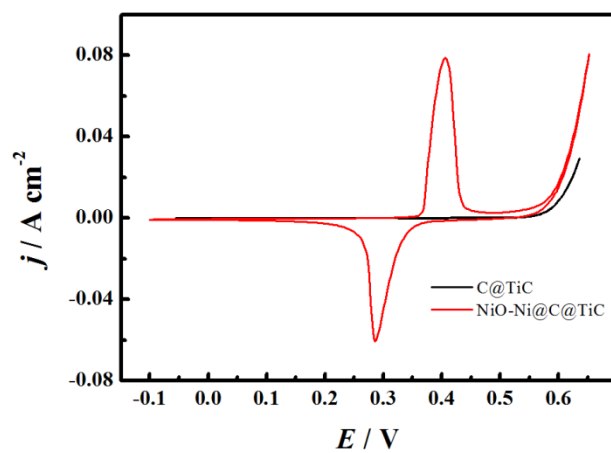

Figure S5 CV curves of NiO-Ni@C@TiC nanoarray electrode and C@TiC substrate at a scan rate  $10 \text{ mV s}^{-1}$ .

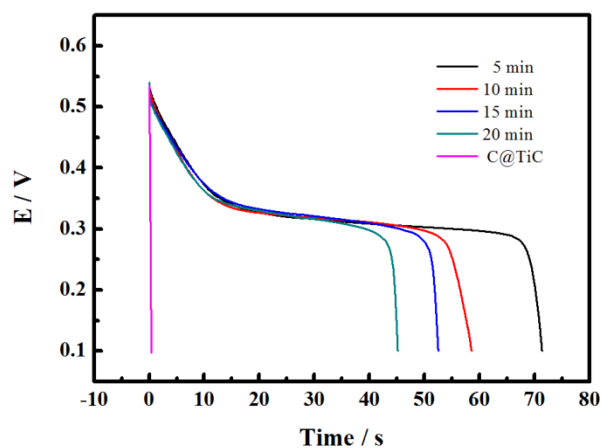

Figure S6 Galvanostatic discharge curves of the NiO-Ni@C@TiC nanoarray electrodes prepared with different electrodeposition time.

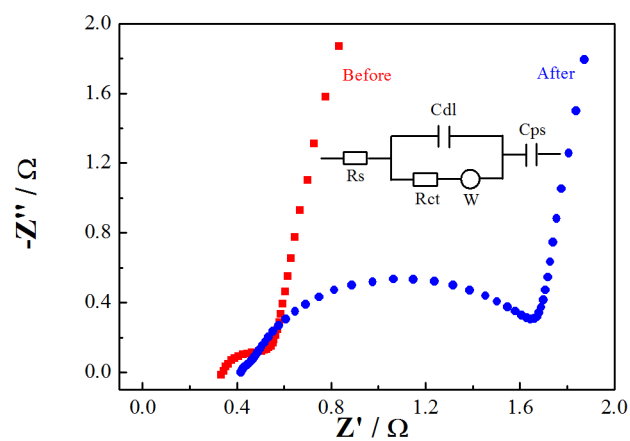

Figure S7 Electrochemical impedance spectra of the NiO-Ni@C@TiC nanoarray electrode before and after charge–discharge cycling
